# Supplementary material for: Two novel heterometallic CuII-SrII coordination polymers based on 3,5-pyrazoledicarboxylic acid: synthesis, crystal structures and magnetic properties
Source: Royal Society of Chemistry journal article supplement (doi:10.1039/c1dt10034c), 2011-01-01

## Supporting Information

### Two novel heterometallic Cu<sup>II</sup>-Sr<sup>II</sup> coordination polymers based on 3,5-pyrazoledicarboxylic acid: synthesis, crystal structures and magnetic properties

Yanmei Chen, Lina Zheng, Shixiong She, Zhou Chen, Bin Hu and Yahong Li

IR spectrum of 1

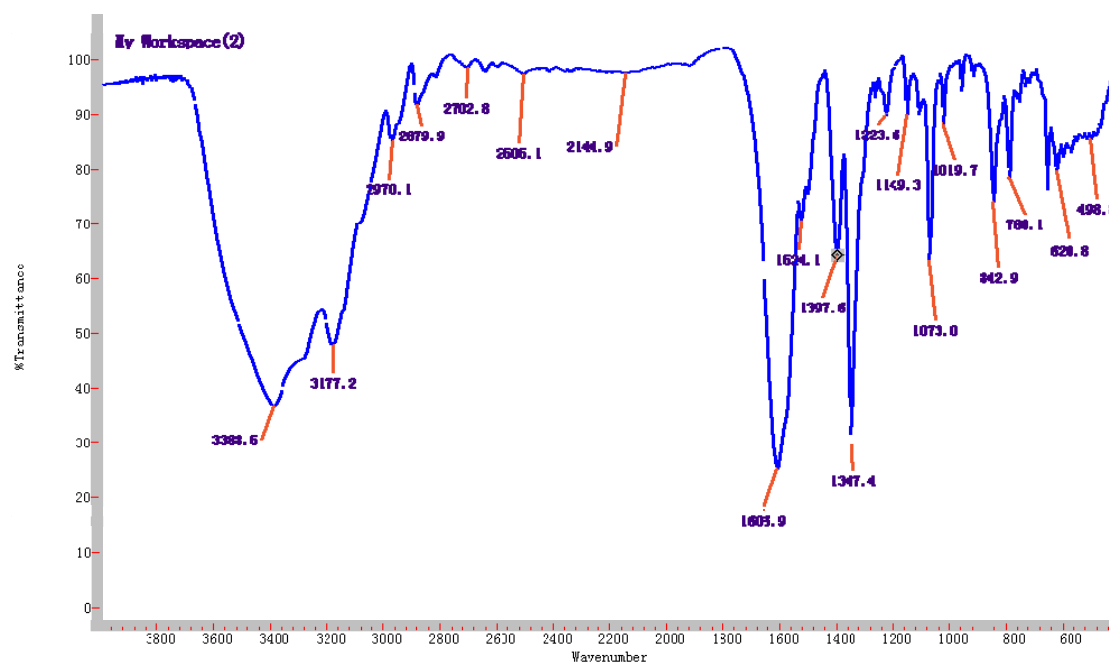

## IR spectrum of 2

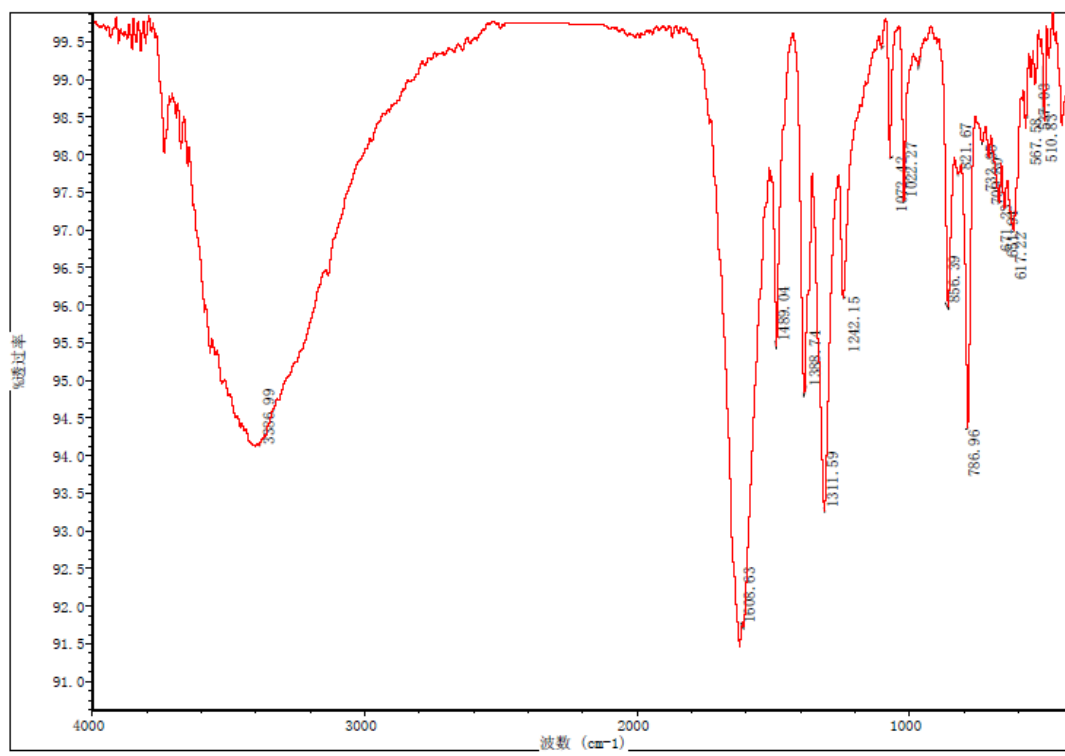

Supplement: c1dt10034c.pdf [file c1dt10034c.pdf]
